# Supplementary material for: Novel Fluorinated Phosphorus–Sulfur Heteroatom Compounds: Synthesis and Characterization of Ferrocenyl- and Aryl-Phosphonofluorodithioic Salts, Adducts, and Esters
Source: MDPI journal article supplement (doi:10.3390/molecules200712175), 2015-07-03
Supplement: s1 [file s1]

## Supplementary Materials

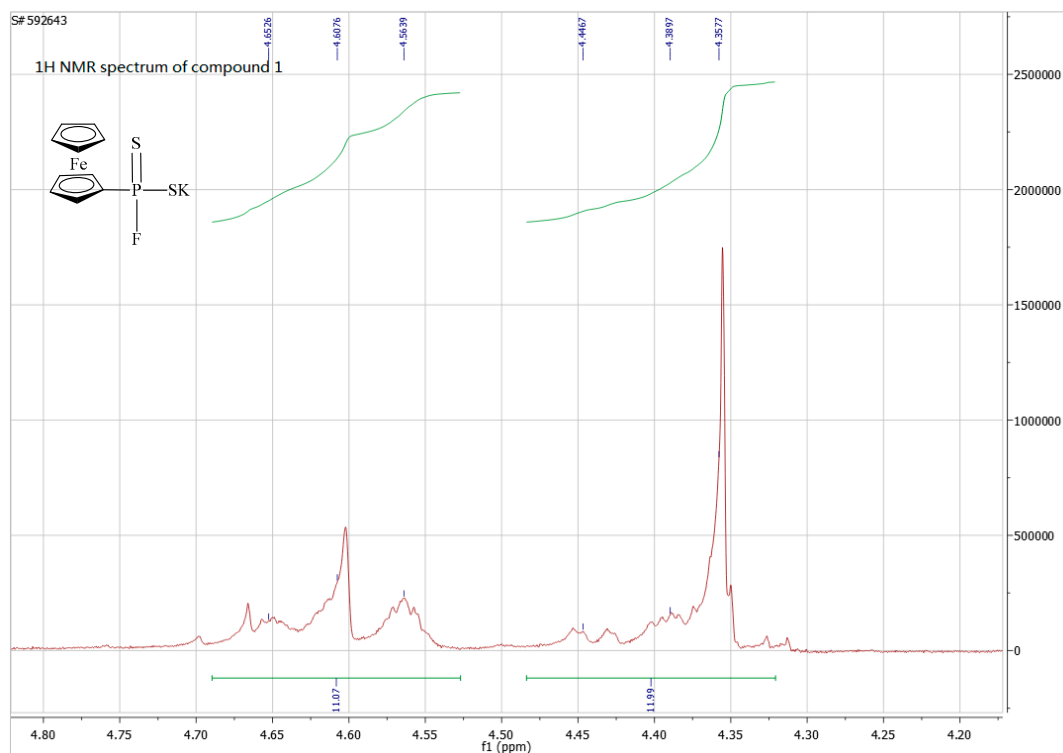

**Figure S1.** <sup>1</sup>H-NMR spectra of compound 1.

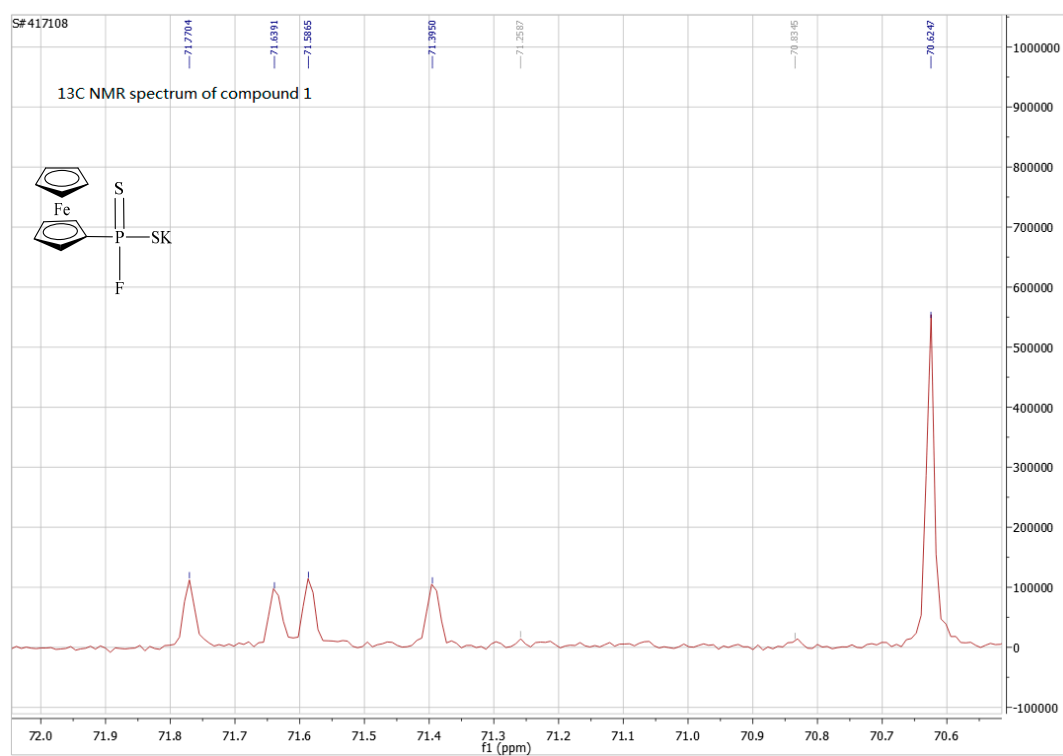

**Figure S2.** <sup>13</sup>C-NMR spectra of compound 1.

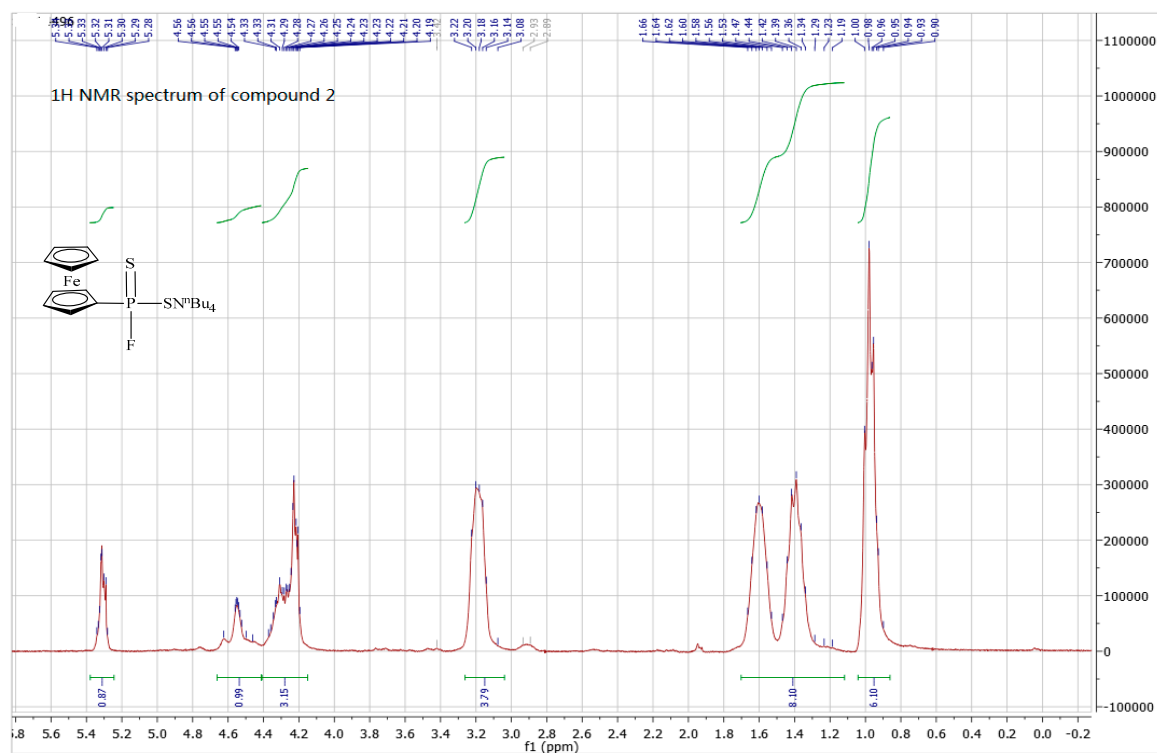

Figure S3. <sup>1</sup>H-NMR spectra of compound 2.

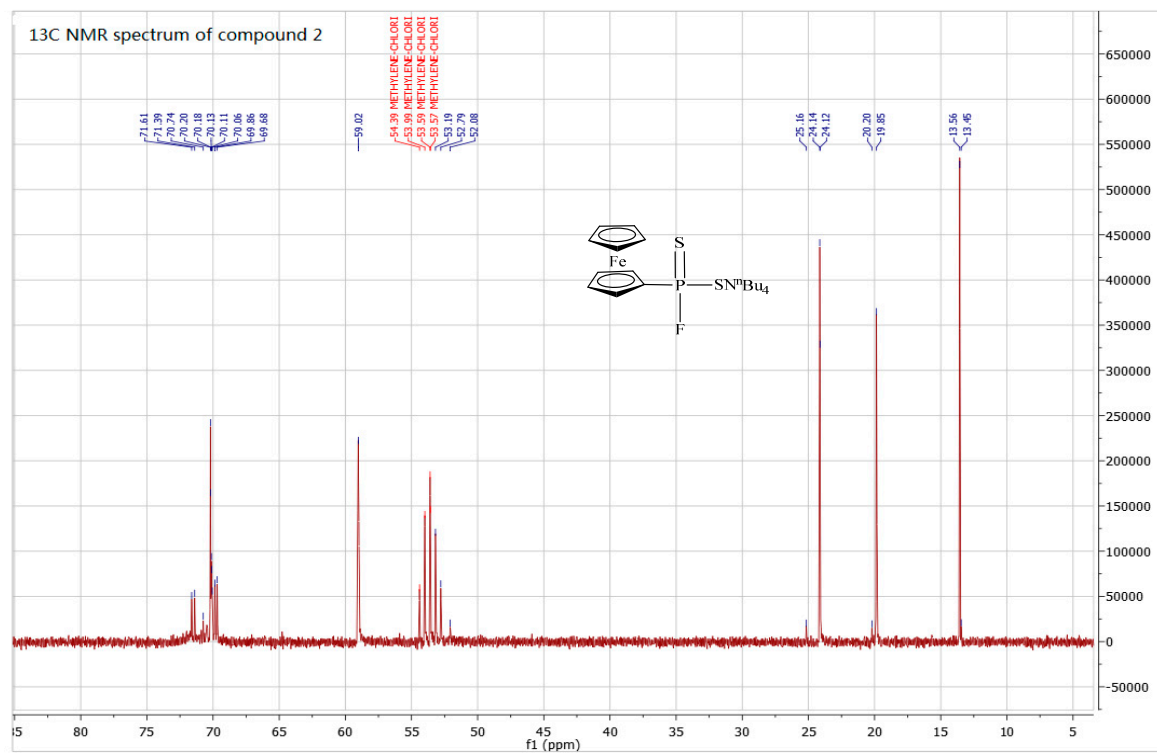

Figure S4. <sup>13</sup>C-NMR spectra of compound 2.

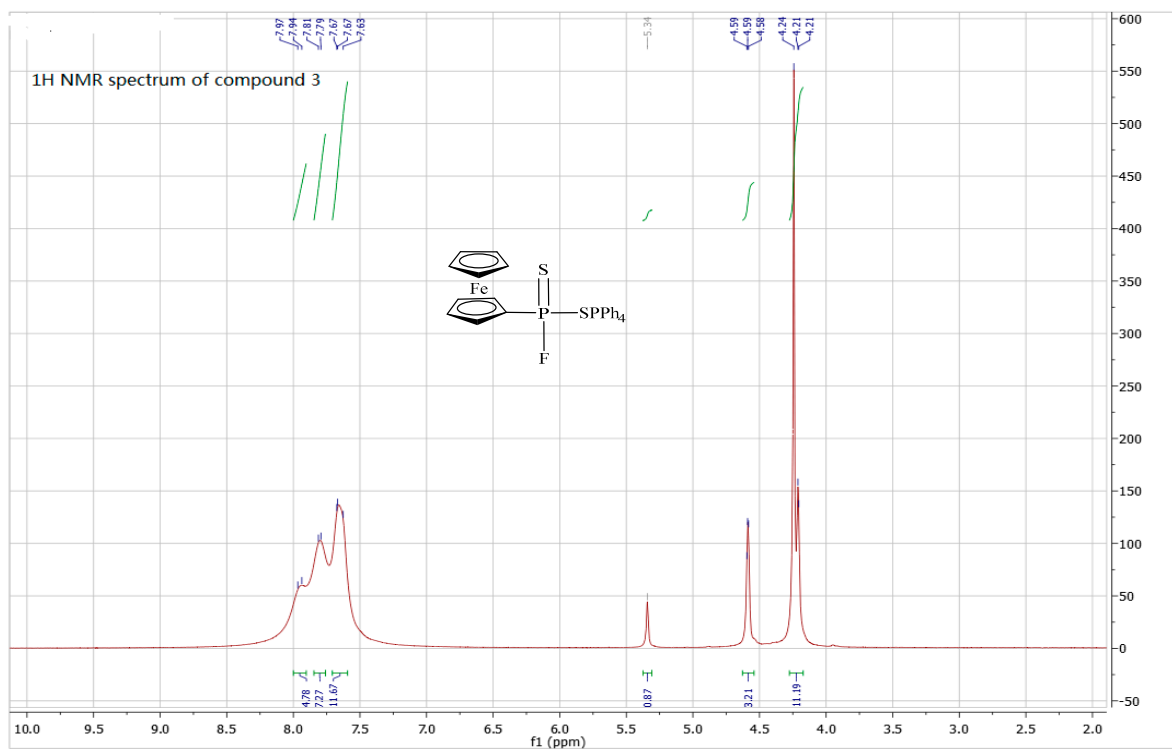

Figure S5. <sup>1</sup>H-NMR spectra of compound 3.

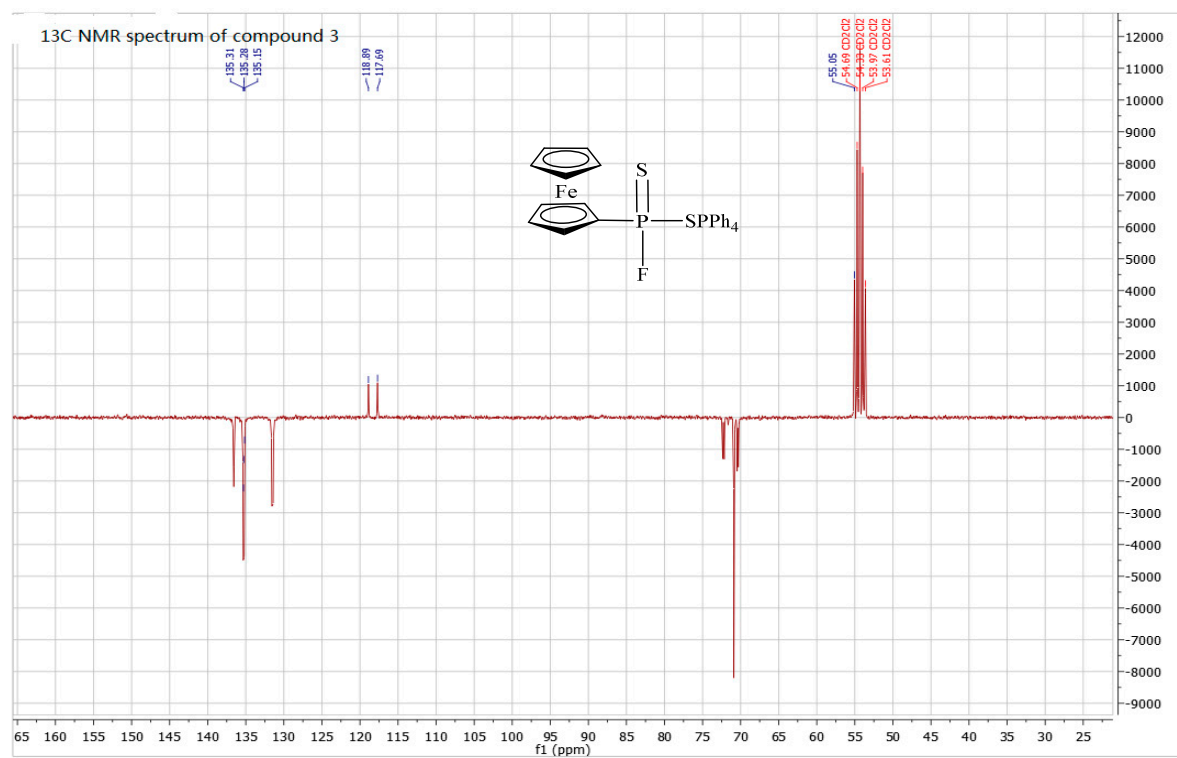

Figure S6. <sup>13</sup>C-NMR spectra of compound 3.

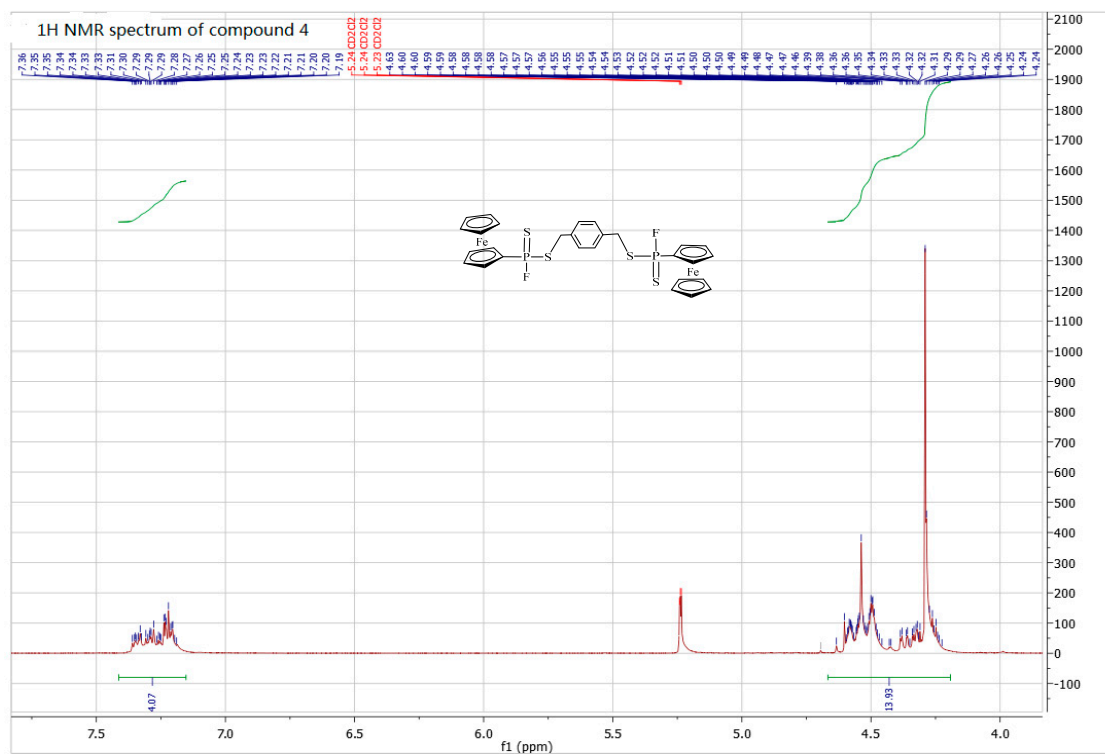

**Figure S7.** <sup>1</sup>H-NMR spectra of compound 4.

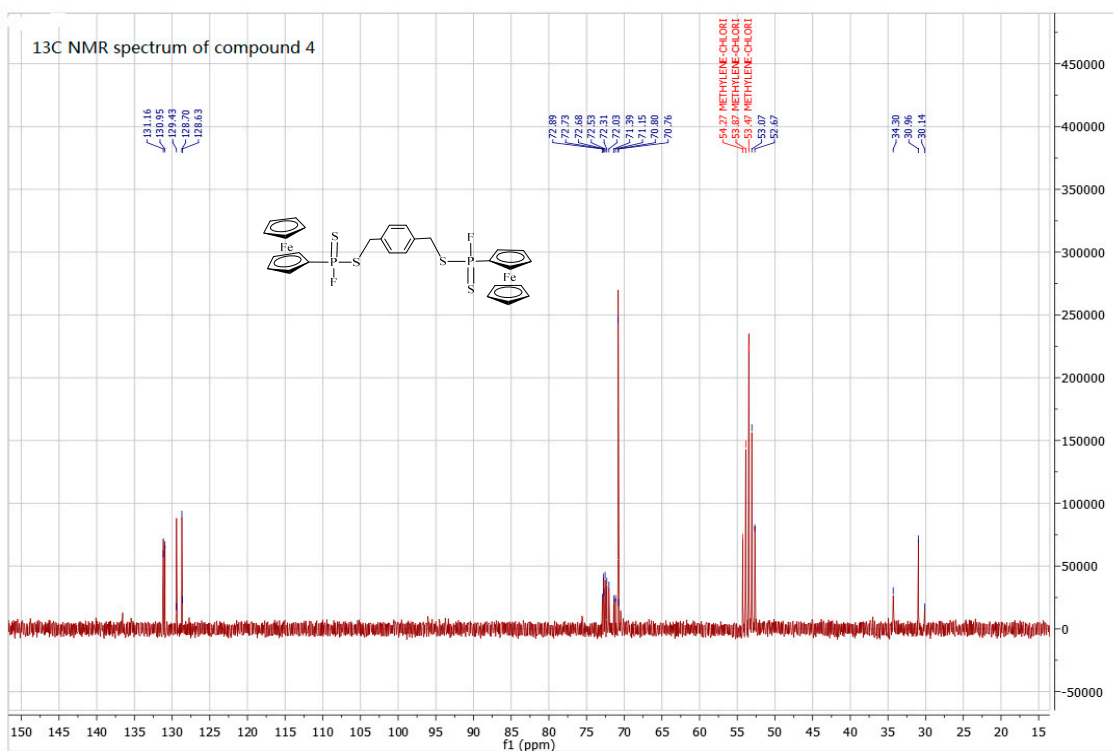

**Figure S8.** <sup>13</sup>C-NMR spectra of compound 4.

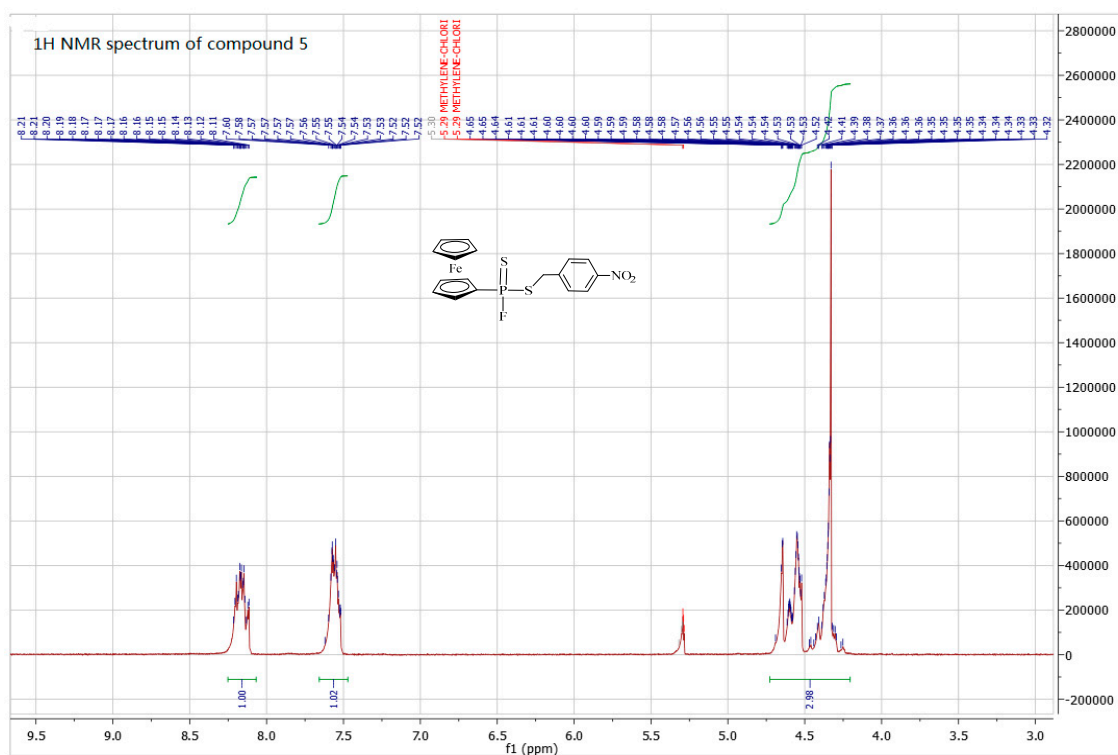

Figure S9. <sup>1</sup>H-NMR spectra of compound 5.

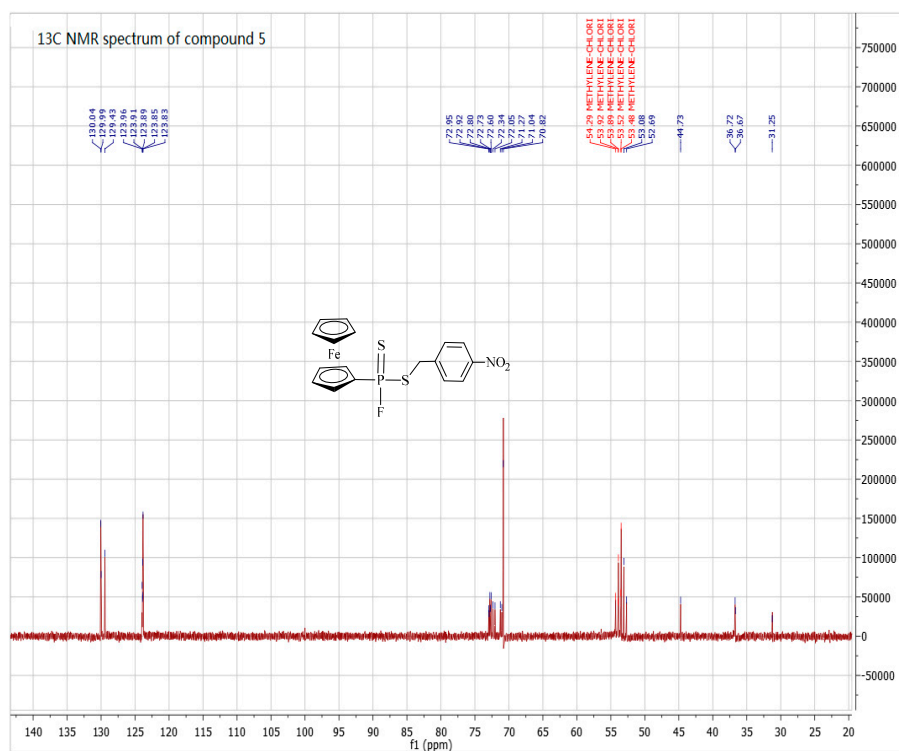

Figure S10. <sup>13</sup>C-NMR spectra of compound 5.

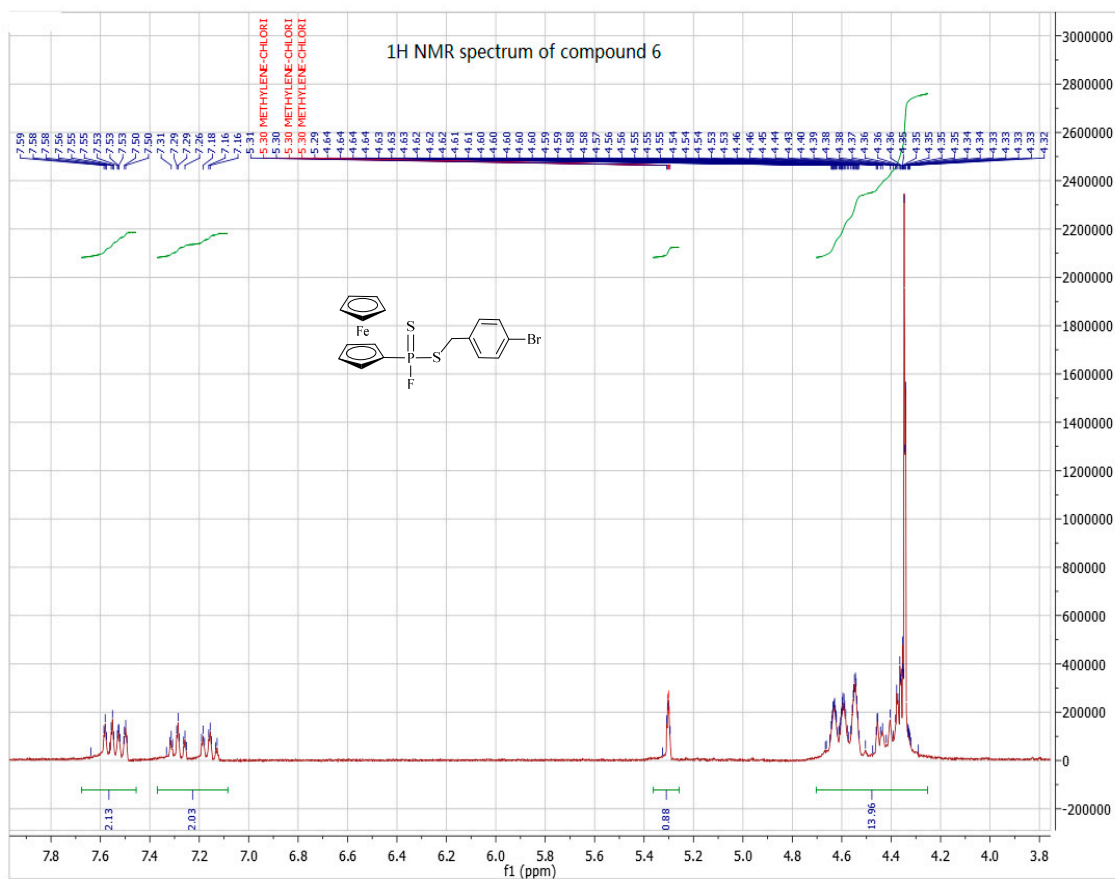

Figure S11. <sup>1</sup>H-NMR spectra of compound 6.

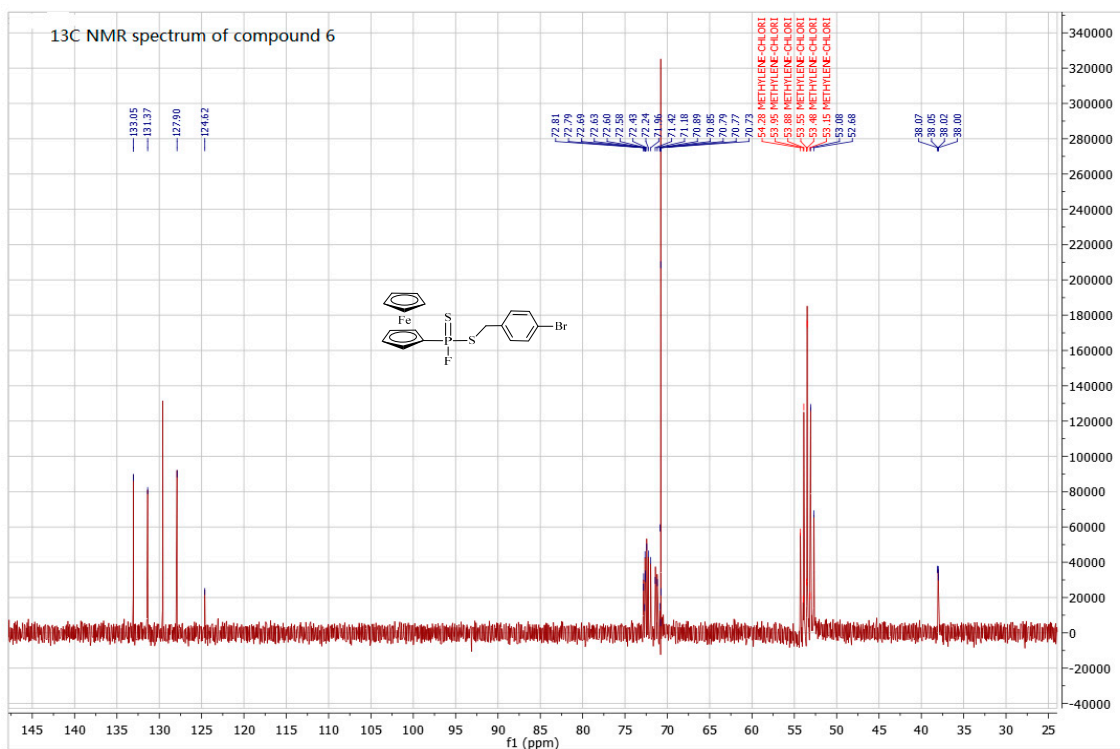

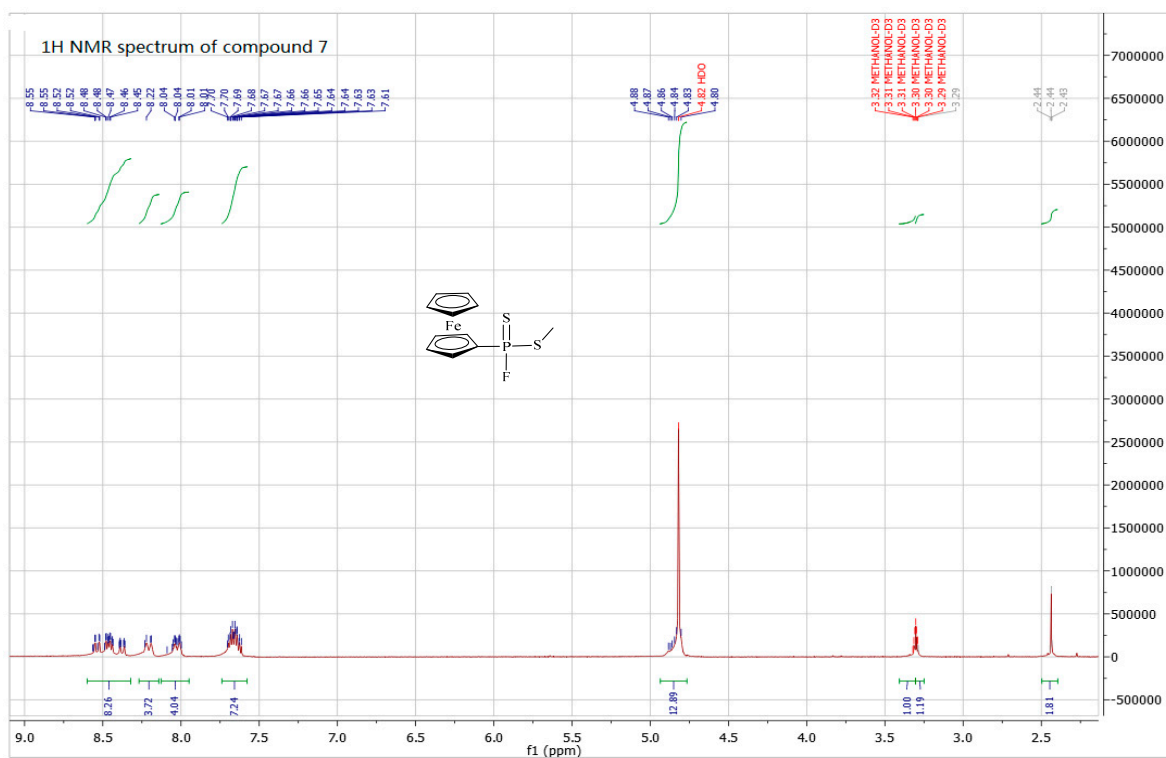

**Figure S13.** <sup>1</sup>H-NMR spectra of compound 7.

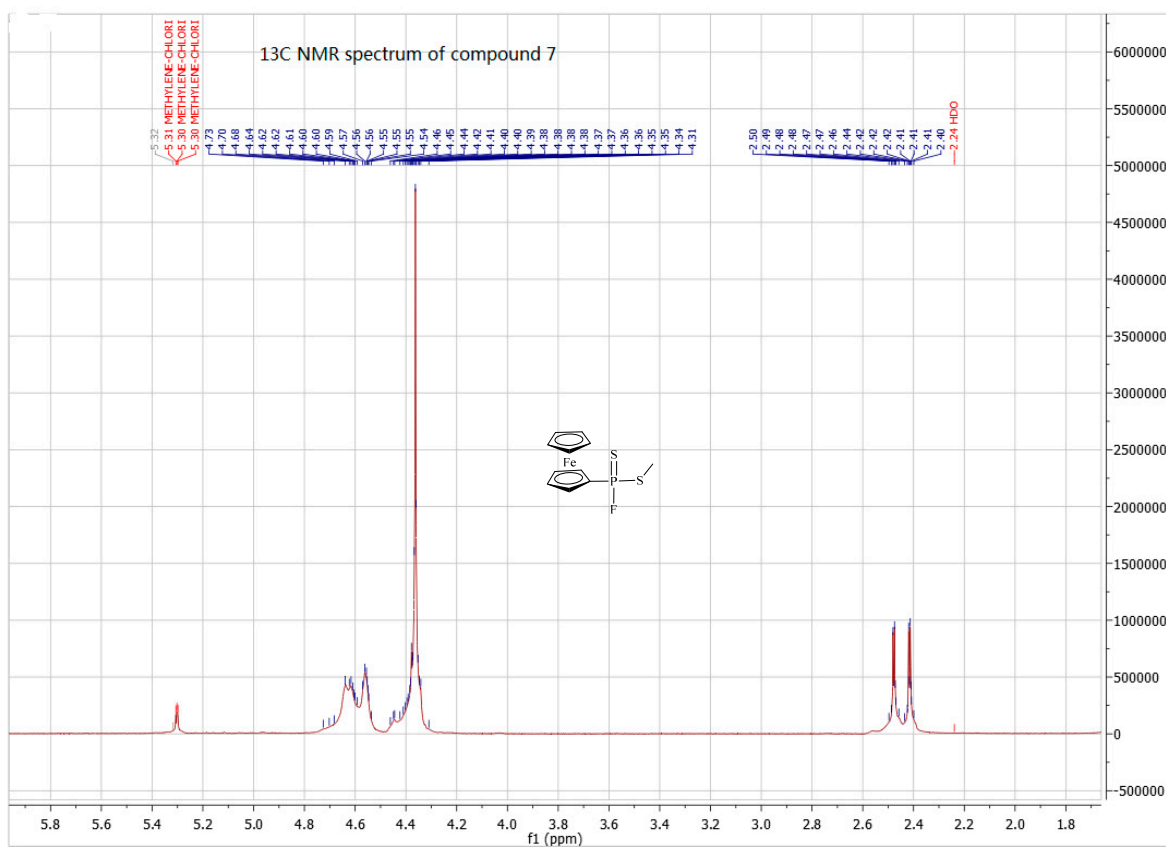

**Figure S14.** <sup>13</sup>C-NMR spectra of compound 7.

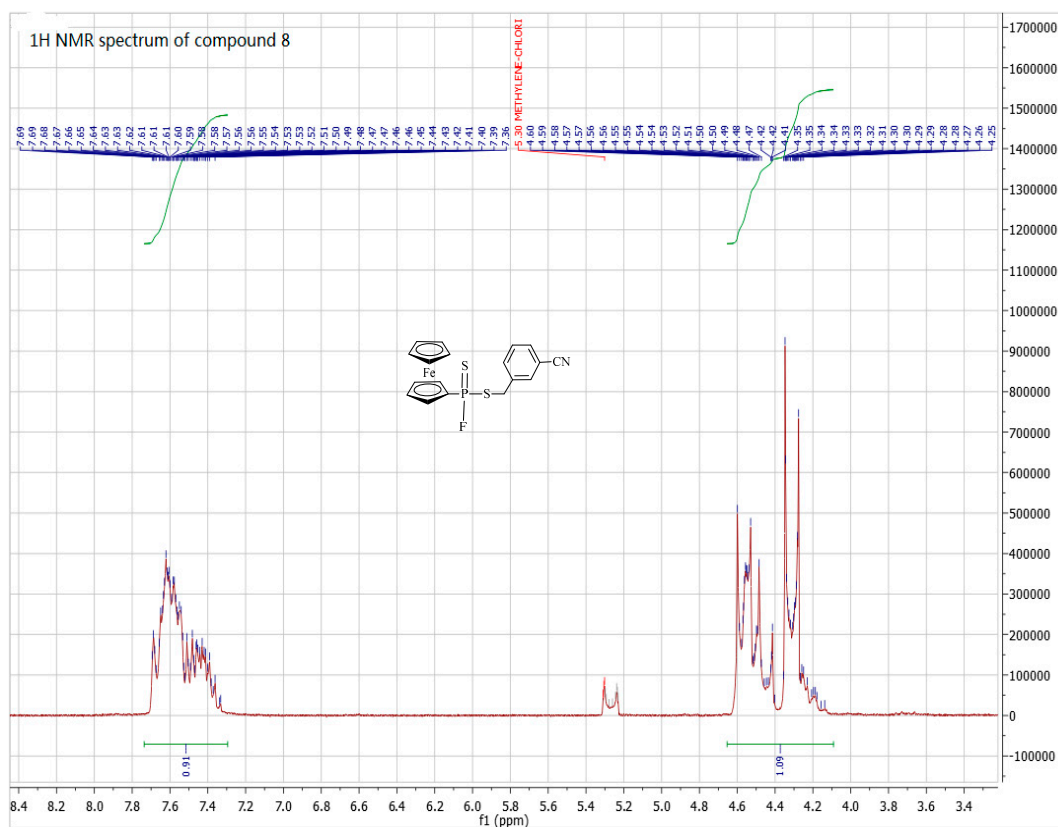

Figure S15. <sup>1</sup>H-NMR spectra of compound 8.

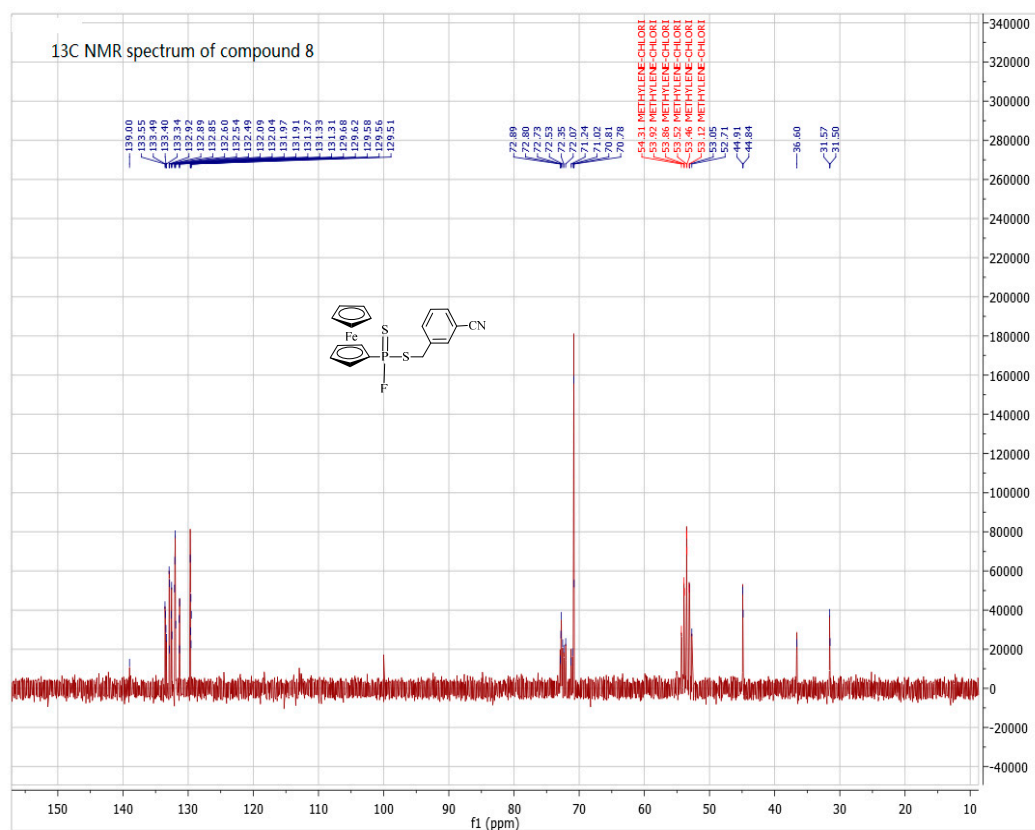

Figure S16. <sup>13</sup>C-NMR spectra of compound 8.

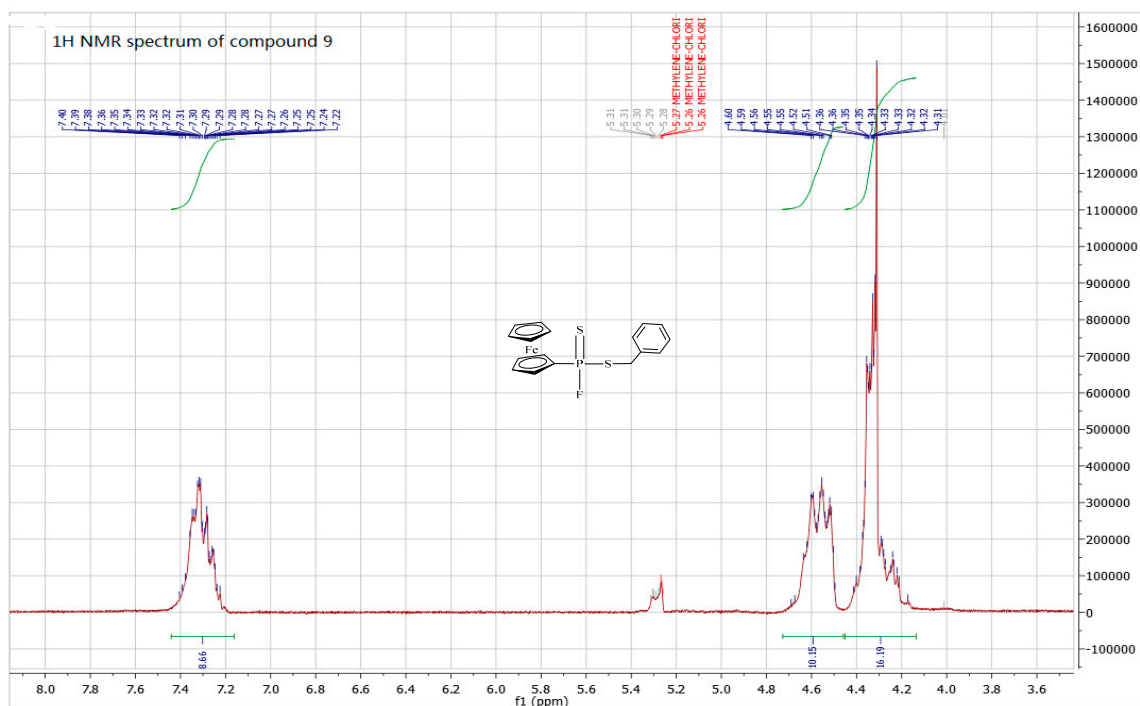Figure S17. <sup>1</sup>H-NMR spectra of compound 9.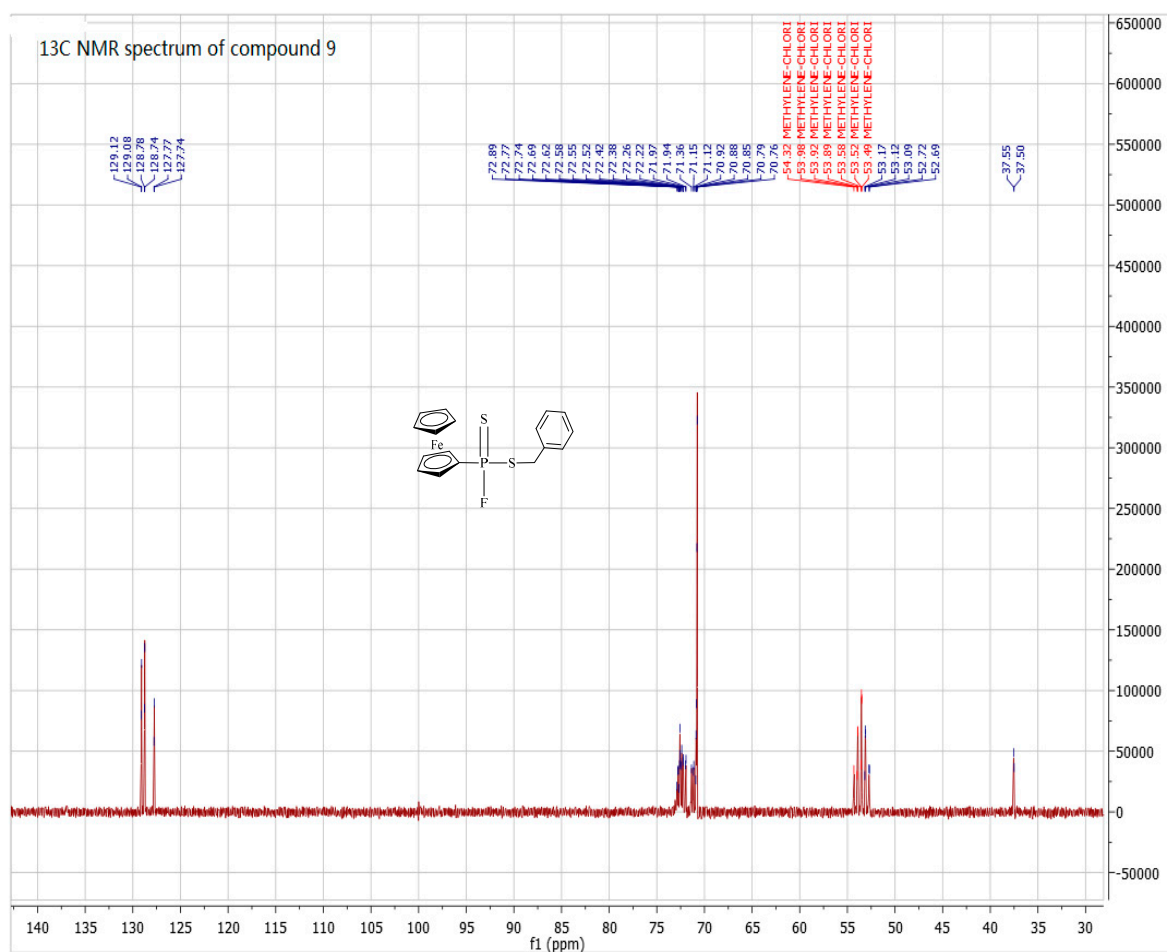Figure S18. <sup>13</sup>C-NMR spectra of compound 9.

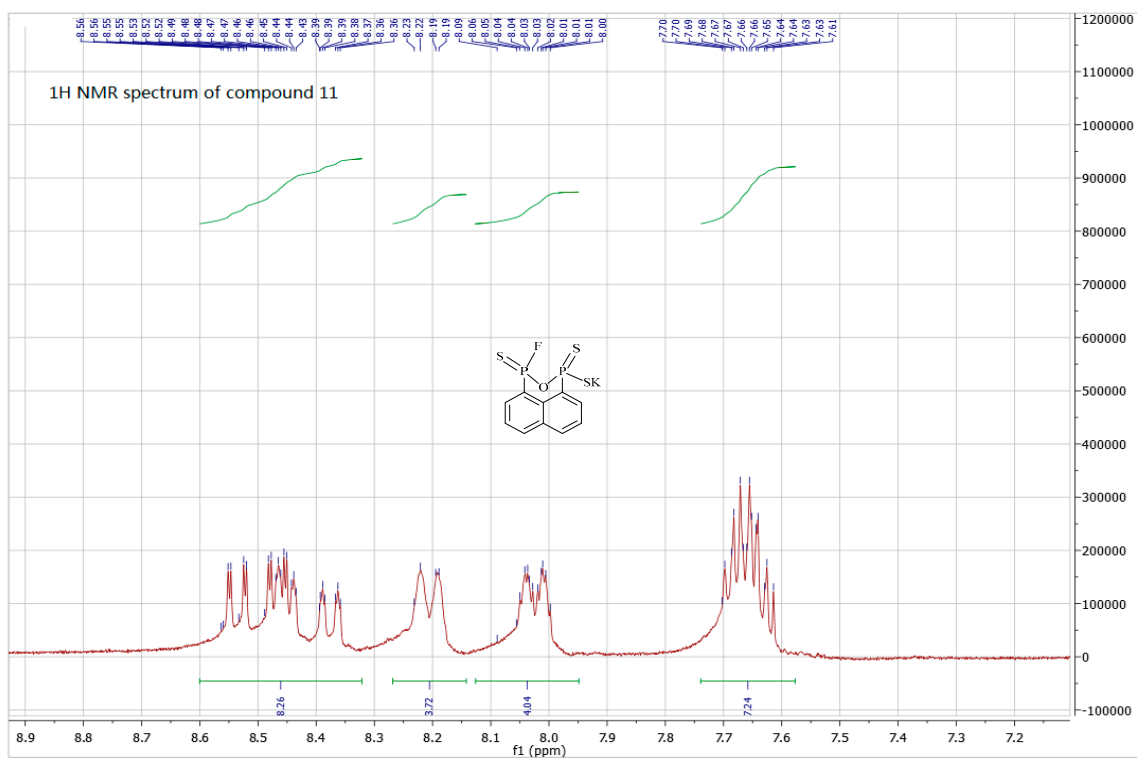

**Figure S19.**  $^1\text{H}$ -NMR spectra of compound **11**.

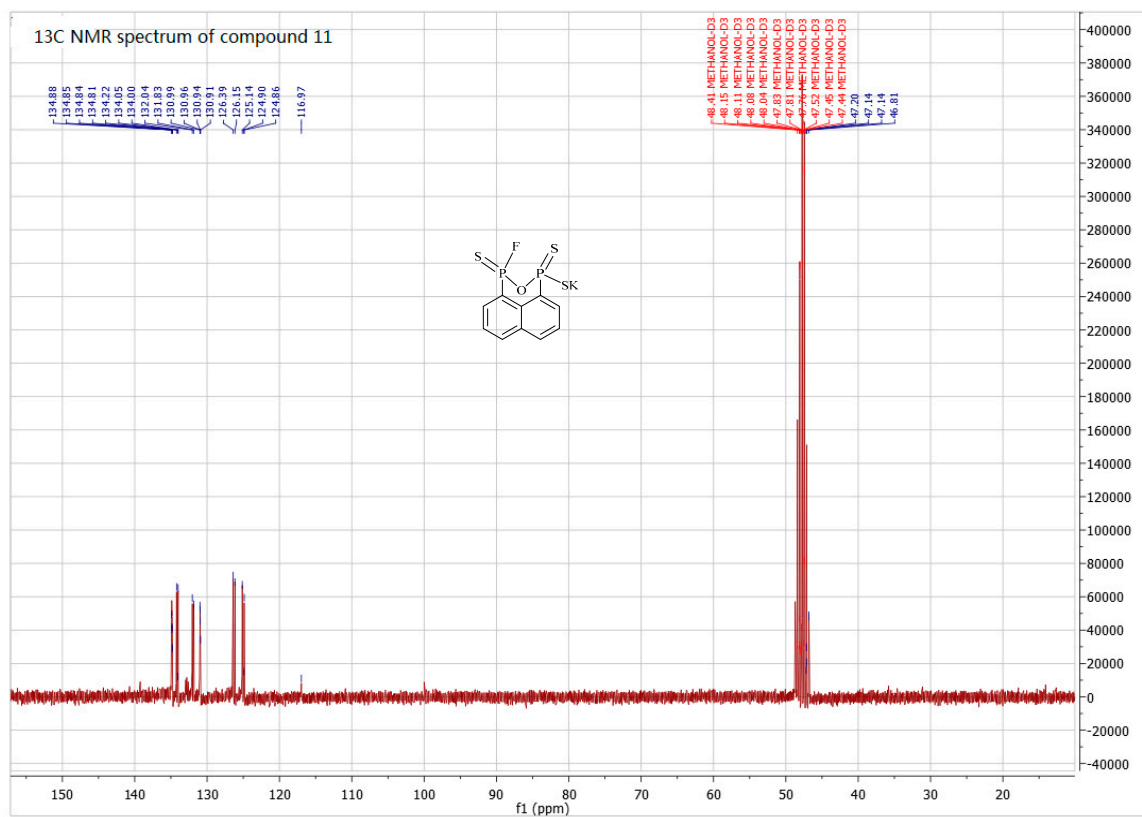

**Figure S20.**  $^{13}\text{C}$ -NMR spectra of compound **11**.

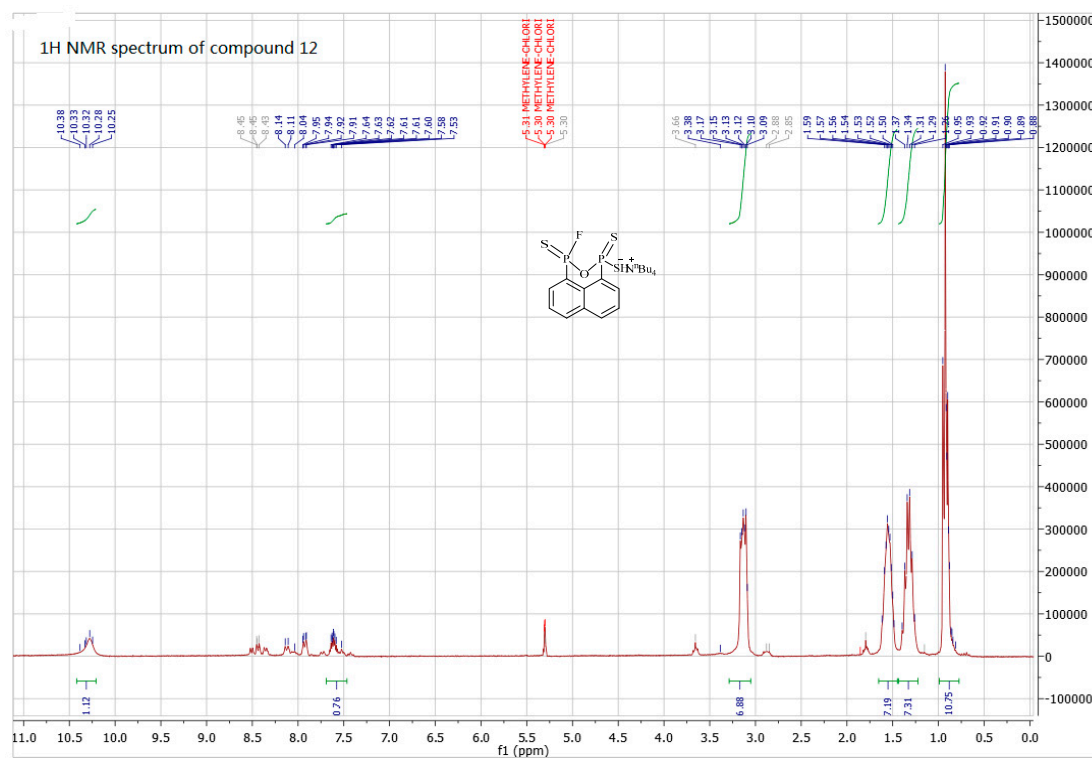Figure S21. <sup>1</sup>H-NMR spectra of compound 12.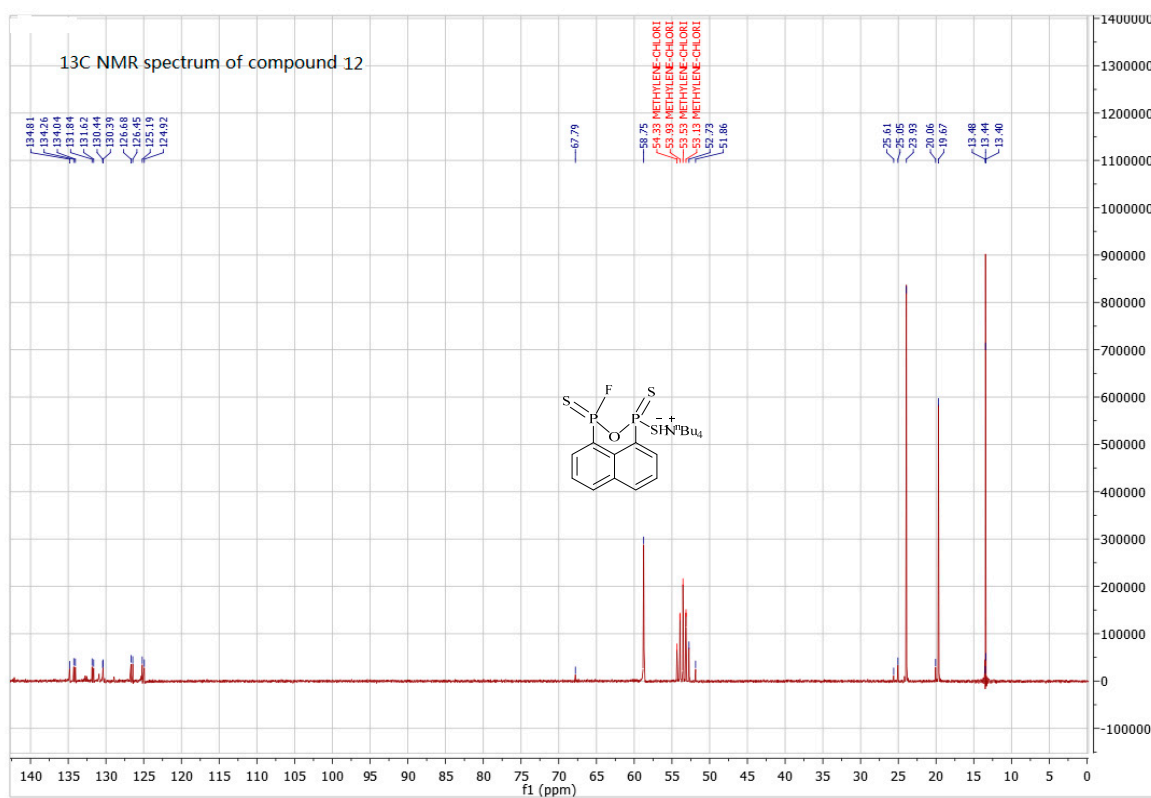Figure S22. <sup>13</sup>C-NMR spectra of compound 12.

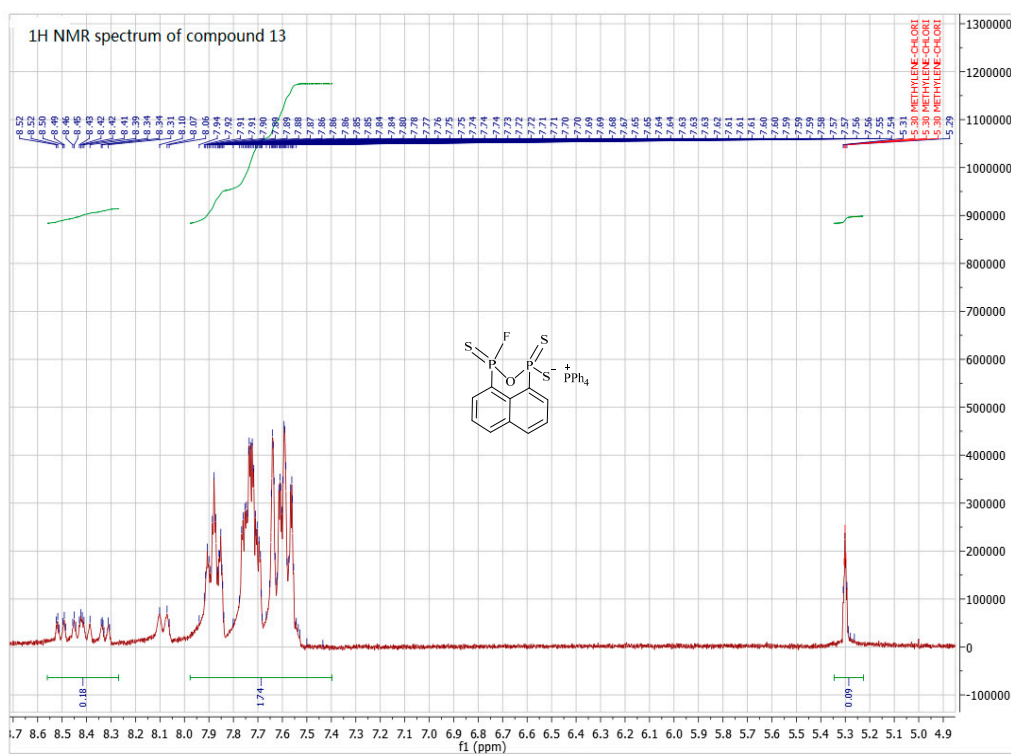

**Figure S23.**  $^1\text{H}$ -NMR spectra of compound **13**.

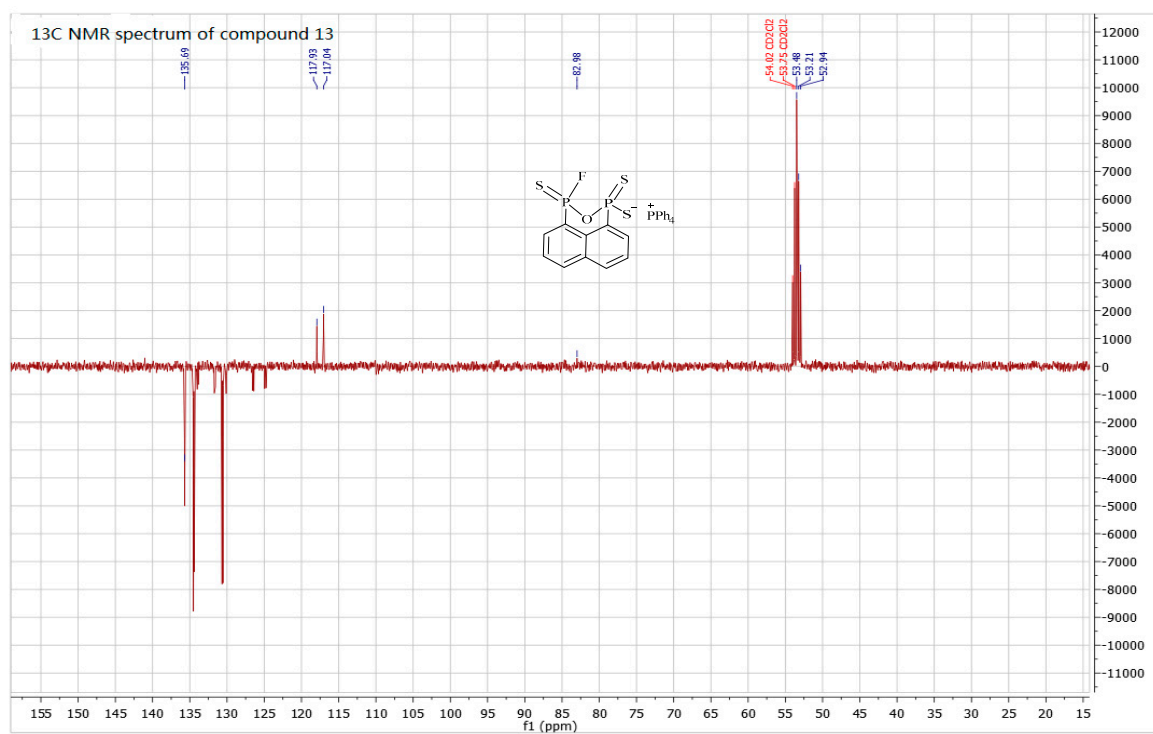

**Figure S24.**  $^{13}\text{C}$ -NMR spectra of compound **13**.

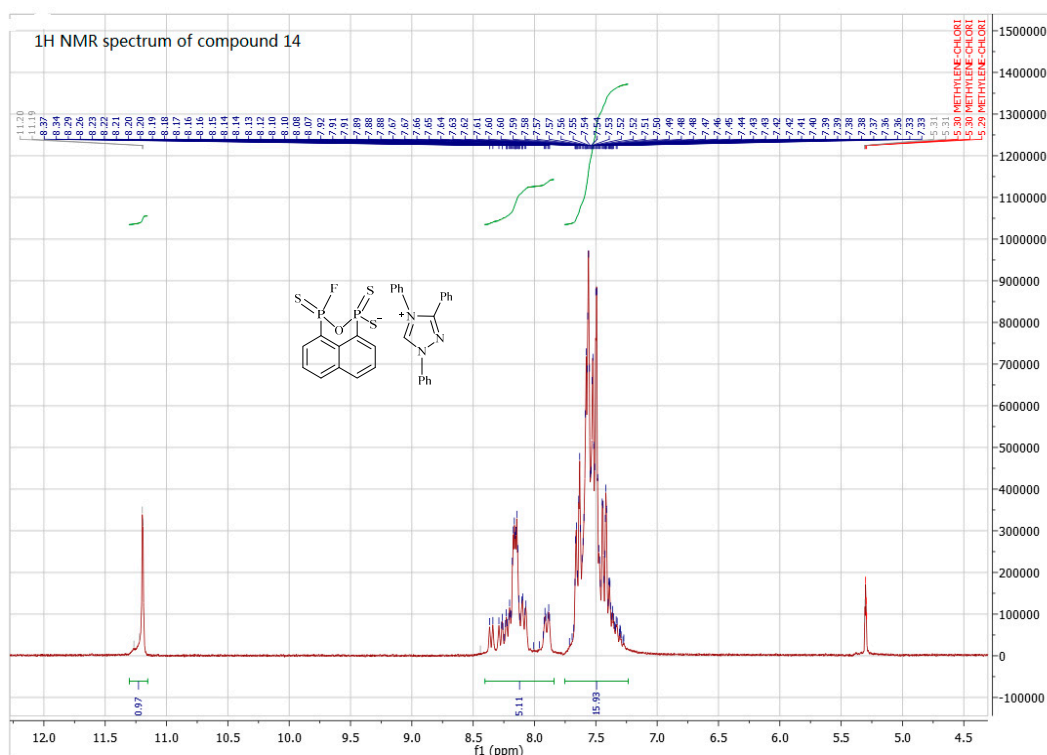

Figure S25.  $^1\text{H}$ -NMR spectra of compound 14.

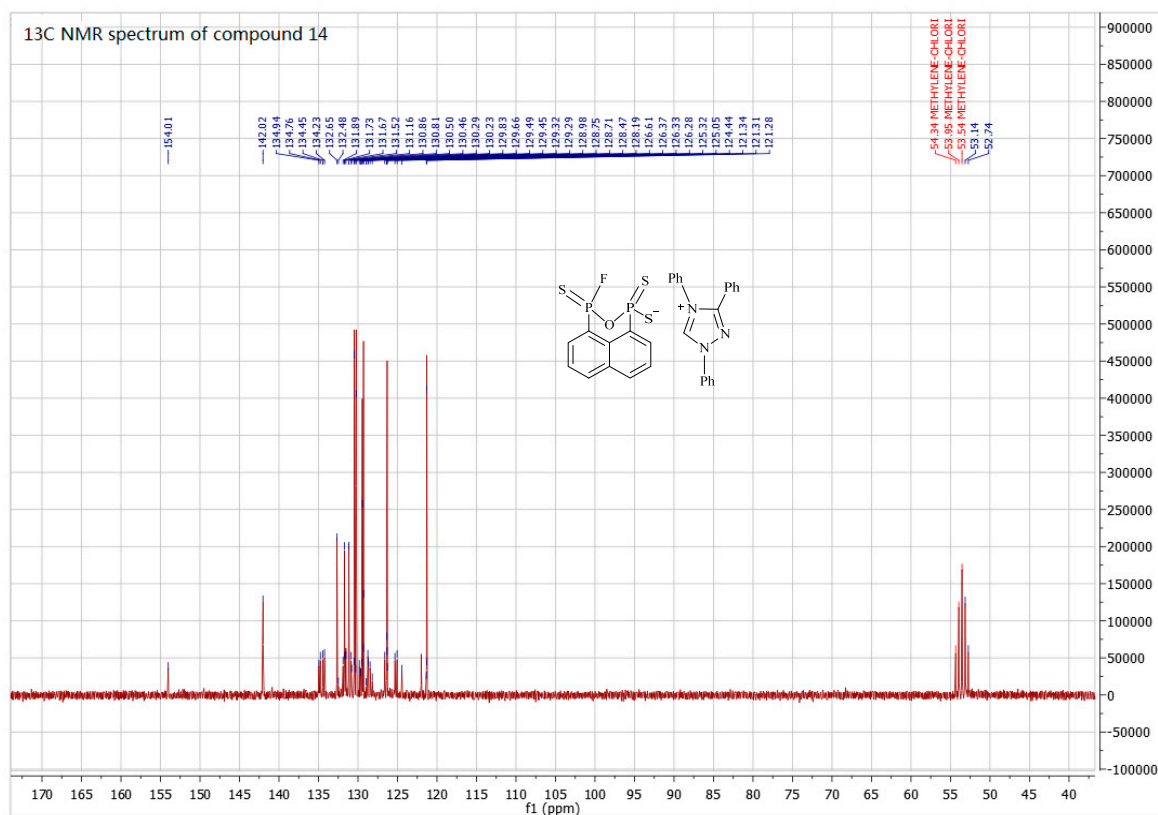

Figure S26.  $^{13}\text{C}$ -NMR spectra of compound 14.

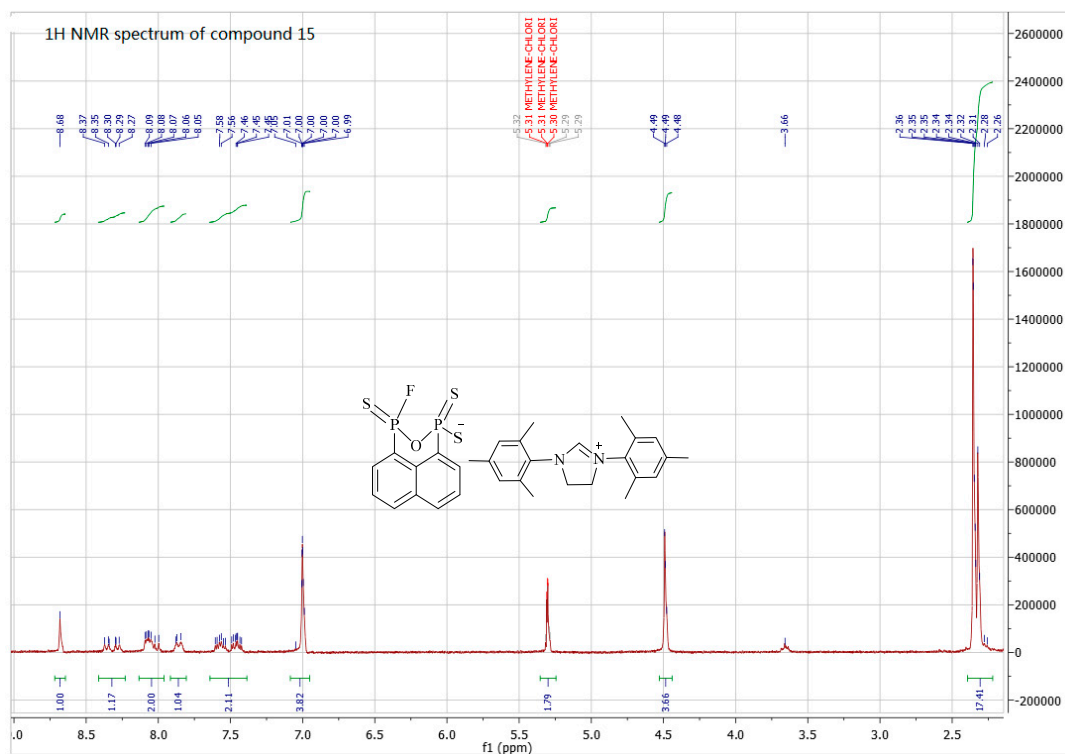

Figure S27. <sup>1</sup>H-NMR spectra of compound 15.

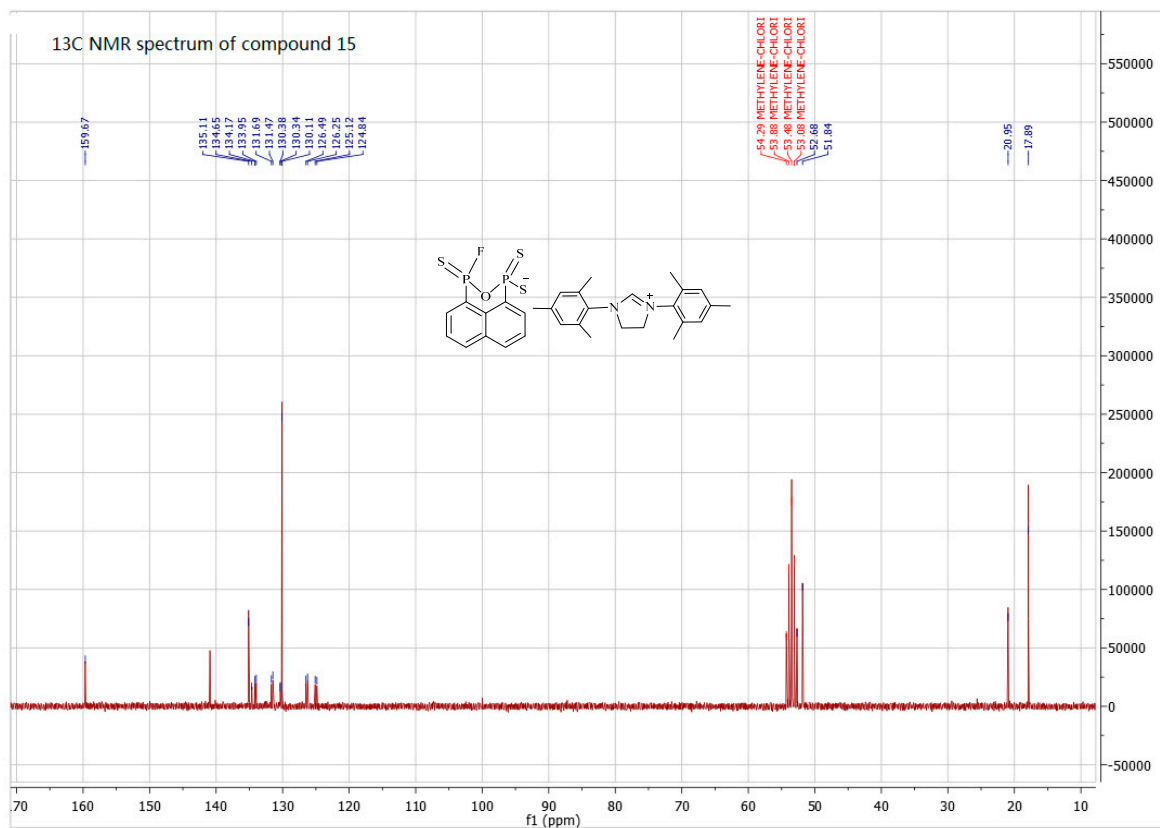

Figure S28. <sup>13</sup>C-NMR spectra of compound 15.

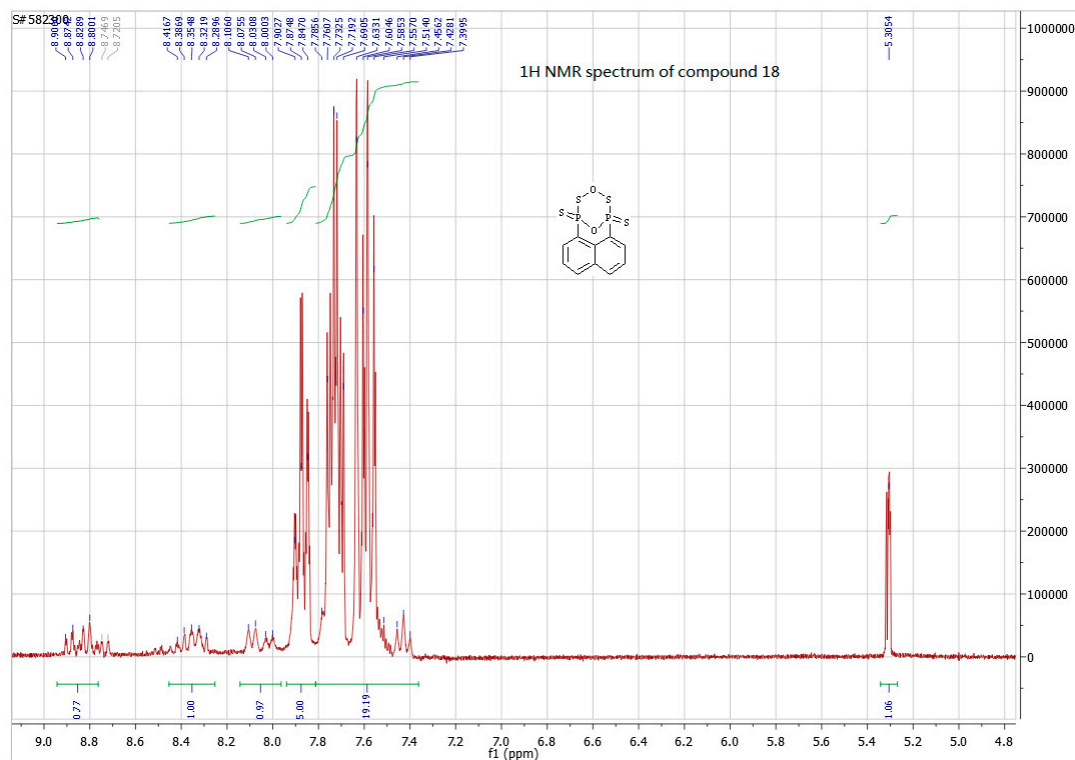Figure S29. <sup>1</sup>H-NMR spectra of compound 18.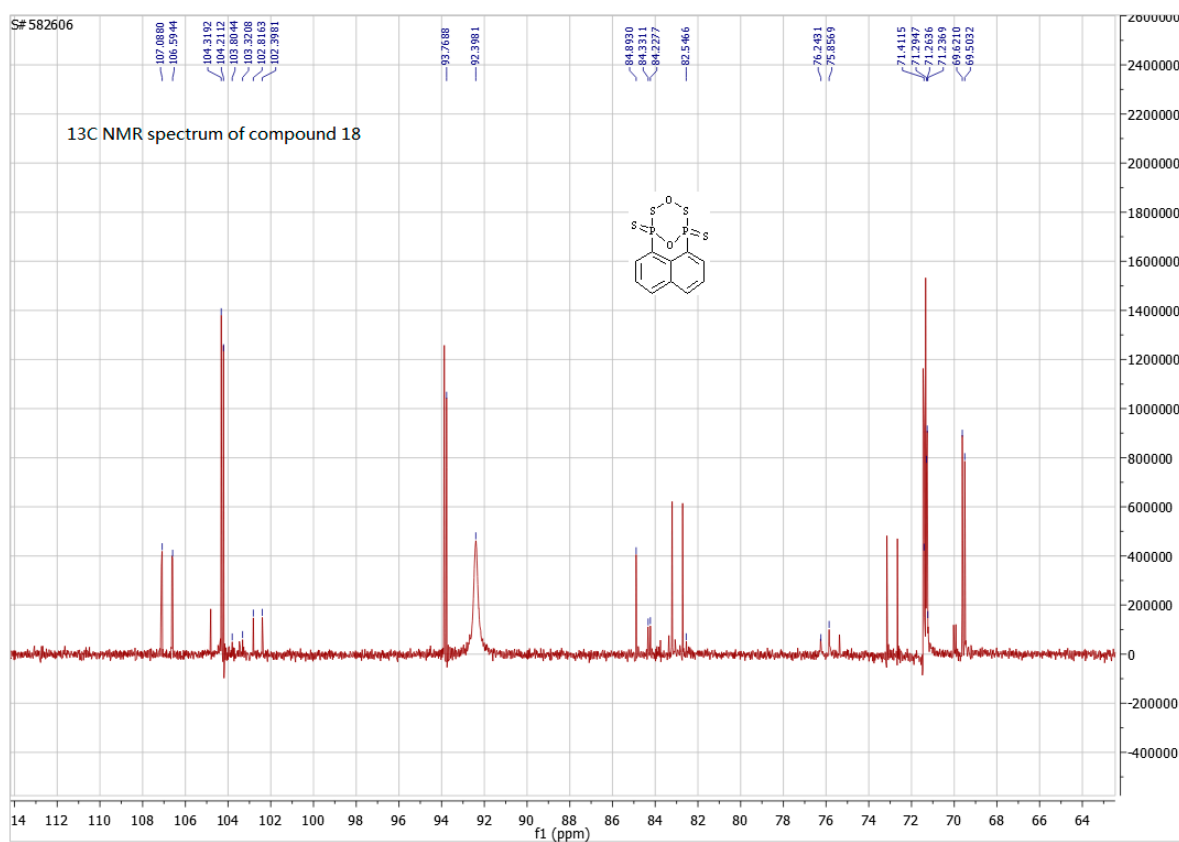Figure S30. <sup>13</sup>C-NMR spectra of compound 18.

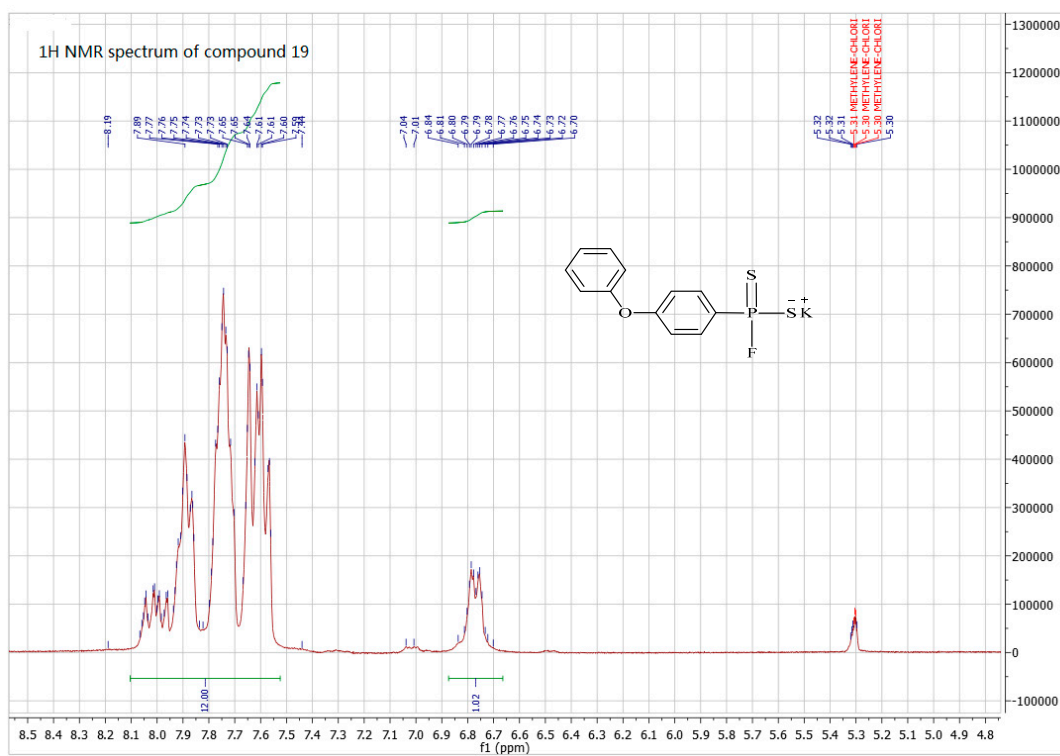

Figure S31. <sup>1</sup>H-NMR spectra of compound 19.

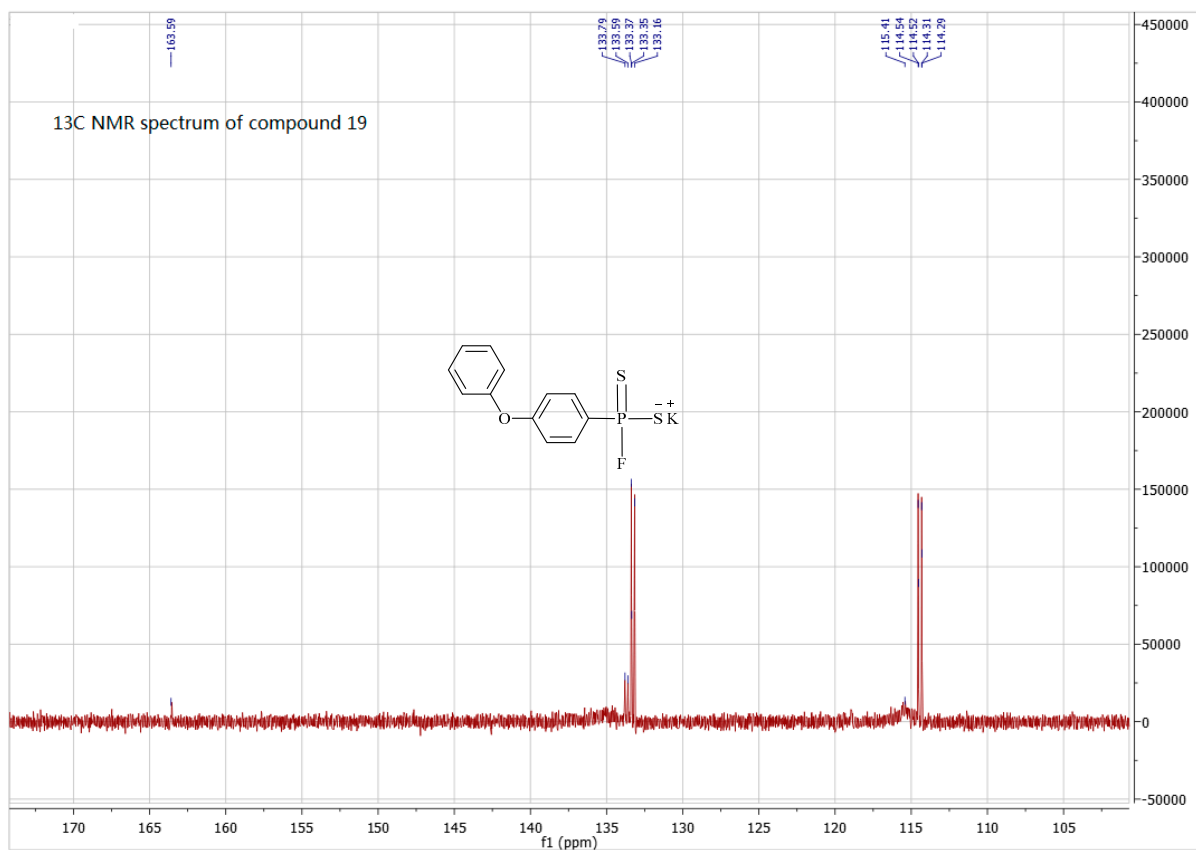

Figure S32. <sup>13</sup>C-NMR spectra of compound 19.

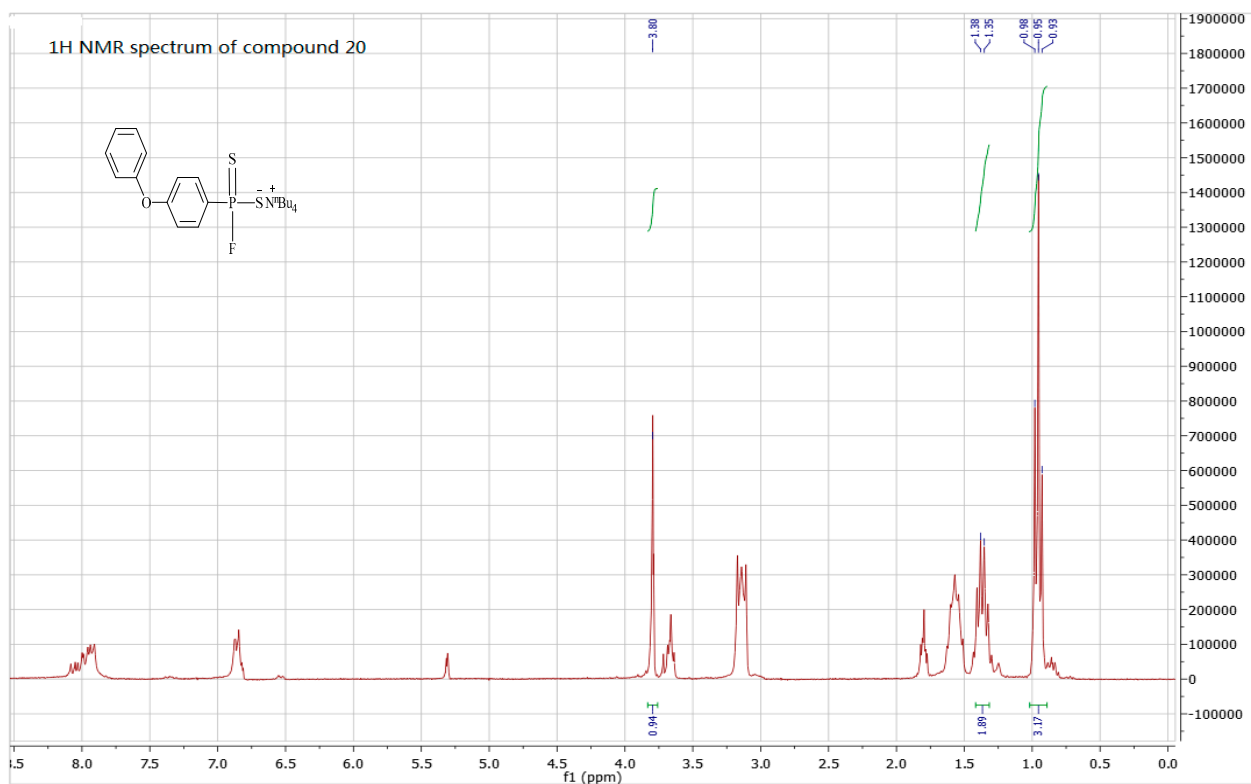Figure S33. <sup>1</sup>H-NMR spectra of compound 20.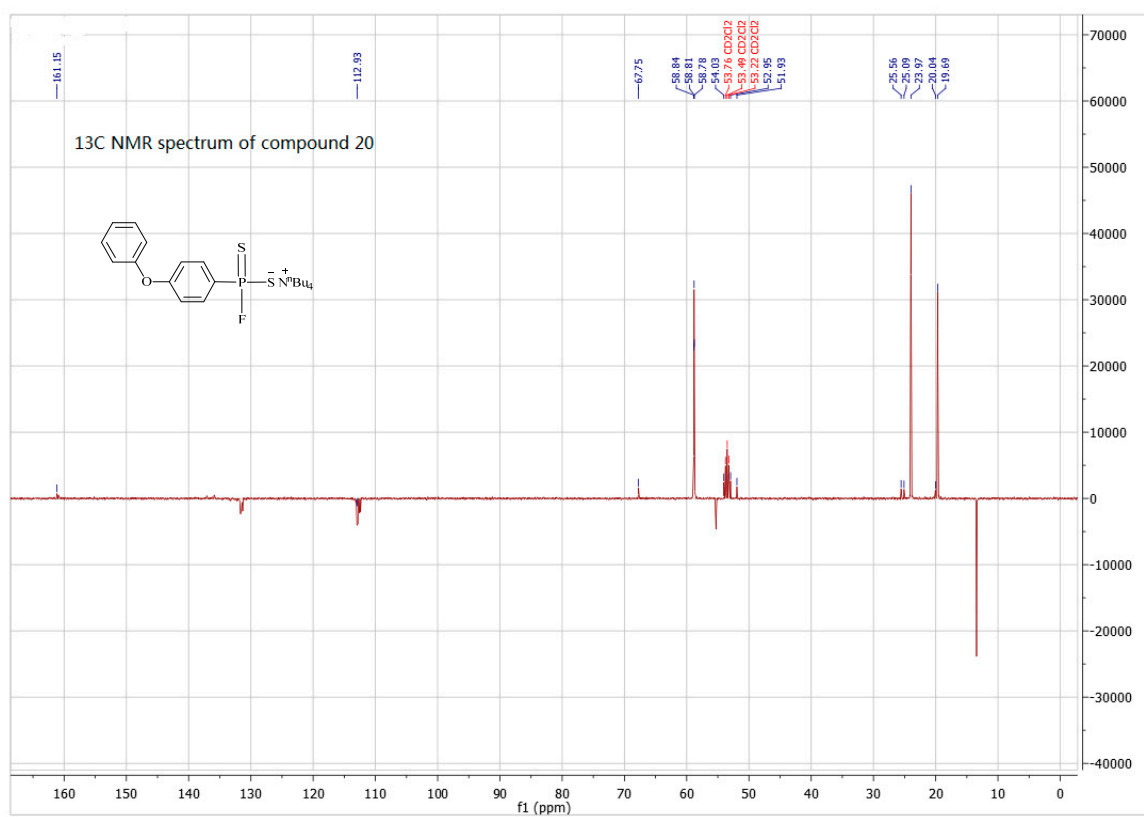Figure S34. <sup>13</sup>C-NMR spectra of compound 20.

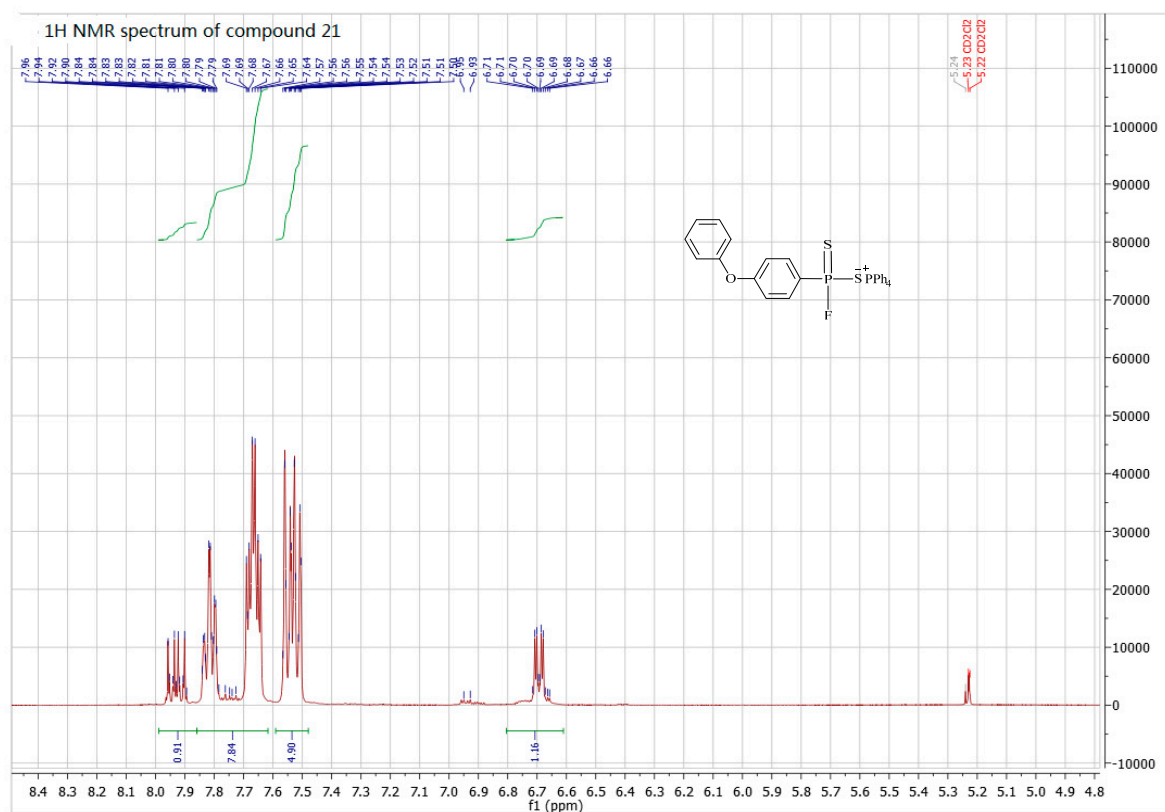Figure S35. <sup>1</sup>H-NMR spectra of compound 21.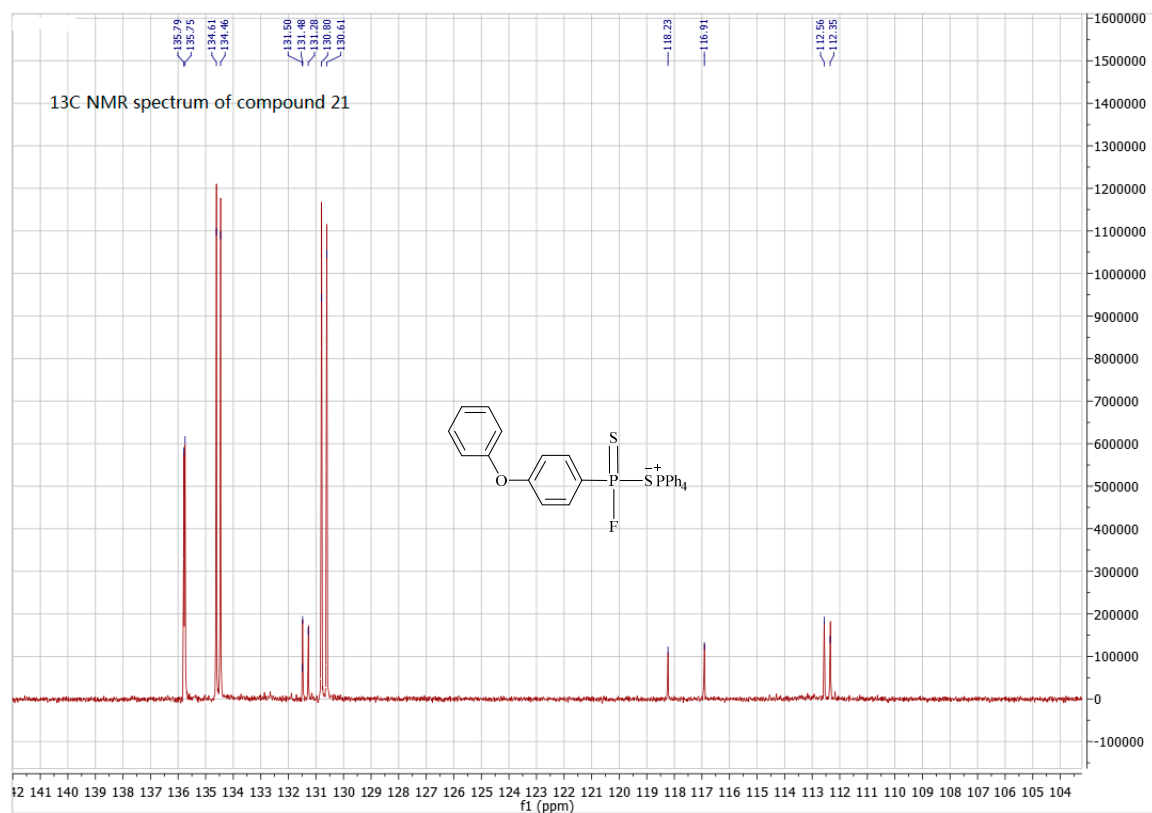Figure S36. <sup>13</sup>C-NMR spectra of compound 21.
